# Supplementary material
Source: MDPI journal article supplement (https://www.mdpi.com/2227-7390/11/1/254)
Supplement: s1 [file s1]

# Supplementary Material

## Estimating the risk of contracting COVID-19 in different settings using a multiscale transmission dynamics model

DRAMANE SAM IDRIS KANTÉ <sup>1,2</sup>, AISSAM JEBRANE <sup>2</sup>,  
ANASS BOUCHNITA <sup>3\*</sup> AND ABDELILAH HAKIM <sup>2</sup>

<sup>1</sup> LAMAI, Faculty of Sciences and Technics, Department of Mathematics, Cadi Ayyad University, Marrakesh, Morocco

<sup>2</sup> Complex Systems and Interactions Research Center, Ecole Centrale Casablanca, Bouskoura, Morocco

<sup>3</sup> Department of Mathematical Sciences, The University of Texas at El Paso, El Paso, Texas, USA

\*Corresponding author: abouchnita@utep.edu

**Table S1.** Collected data for shopping centres.

| Shopping centre |                |                     |                      |
|-----------------|----------------|---------------------|----------------------|
| Age bracket     | Demography (%) | Desired speed (m/s) | Desired distance (m) |
| [0,5[           | 0              | $N(0.88;0.106)$     | $N(1.99;0.056)$      |
| [5,10[          | 0.6            | $N(1.15;0.04)$      |                      |
| [10,15[         | 1              | $N(1.20;0.048)$     | $N(2.04;0.075)$      |
| [15,20[         | 12.75          | $N(1.36;0.036)$     |                      |
| [20,25[         | 12.25          | $N(1.42;0.035)$     | $N(2.16;0.072)$      |
| [25,30[         | 12.50          |                     |                      |
| [30,35[         | 12.04          | $N(1.42;0.051)$     | $N(2.19;0.0814)$     |
| [35,40[         | 11.42          |                     |                      |
| [40,45[         | 10.03          | $N(1.39;0.065)$     | $N(2.15;0.076)$      |
| [45,50[         | 6.05           |                     |                      |
| [50,55[         | 5.43           | $N(1.30;0.023)$     | $N(2.11;0.066)$      |
| [55,60[         | 5.11           |                     |                      |
| [60,65[         | 4.49           | $N(1.26;0.023)$     | $N(2.12;0.073)$      |
| [65,70[         | 3.44           |                     |                      |
| [70,75[         | 2.08           | $N(1.01;0.003)$     | $N(2.24;0.047)$      |
| [75,80[         | 1.35           |                     |                      |

**Table S2.** Collected data for schools.

| School      |                |                     |                      |
|-------------|----------------|---------------------|----------------------|
| Age bracket | Demography (%) | Desired speed (m/s) | Desired distance (m) |
| [0,5[       | 0.885          | $N(0.65;0.106)$     | $N(1.26;0.125)$      |
| [5,10[      | 30.97          | $N(1.08;0.028)$     |                      |
| [10,15[     | 38.05          | $N(1.33;0.012)$     | $N(1.31;0.135)$      |
| [15,20[     | 22.12          | $N(1.45;0.035)$     |                      |
| [20,25[     | 0.885          | $N(1.44;;0.023)$    | $N(1.35;0.141)$      |
| [25,30[     | 0.885          | $N(1.39;0.246)$     |                      |
| [30,35[     | 0.885          | $N(1.36;0.0304)$    | $N(1.38;0.108)$      |
| [35,40[     | 0.885          | $N(1.33;0.030)$     |                      |
| [40,45[     | 0.885          | $N(1.3;0.021)$      | $N(1.36;0.128)$      |
| [45,50[     | 0.885          | $N(1.26;0.021)$     |                      |
| [50,55[     | 0.885          | $N(1.16;0.243)$     | $N(1.22;0.015)$      |
| [55,60[     | 1.77           | $N(1.2;0.015)$      |                      |
| [60,65[     | 0              | $N(1.2;0.018)$      | $N(1.37;0.129)$      |
| [65,70[     | 0              | $N(1.18;0.018)$     |                      |
| [70,75[     | 0              | $N(1.08;0.015)$     | $N(1.49;0.1309)$     |
| [75,80[     | 0              | $N(0.92;0.015)$     |                      |

**Table S3.** Collected data for residential areas/households.

| Residential area/Household |                |                     |                      |
|----------------------------|----------------|---------------------|----------------------|
| Age bracket                | Demography (%) | Desired speed (m/s) | Desired distance (m) |
| [0,5[                      | 11.55          | $N(0.88;0.106)$     | $N(0.38;0.095)$      |
| [5,10[                     | 12.23          | $N(1.53;0.447)$     |                      |
| [10,15[                    | 11.42          |                     | $N(1.55;0.323)$      |
| [15,20[                    | 07.45          | $N(0.41;0.097)$     |                      |
| [20,25[                    | 07.17          |                     |                      |
| [25,30[                    | 07.53          | $N(1.47;0.246)$     | $N(0.42;0.099)$      |
| [30,35[                    | 07.25          |                     |                      |
| [35,40[                    | 06.89          |                     | $N(0.45;0.126)$      |
| [40,45[                    | 06.05          |                     |                      |
| [45,50[                    | 05.39          | $N(1.38;0.243)$     | $N(0.41;0.103)$      |
| [50,55[                    | 04.83          |                     |                      |
| [55,60[                    | 04.55          |                     | $N(0.47;0.144)$      |
| [60,65[                    | 03.03          |                     |                      |
| [65,70[                    | 02.34          | $N(1.16;0.255)$     | $N(0.49;0.149)$      |
| [70,75[                    | 01.41          |                     |                      |
| [75,80[                    | 0.92           |                     |                      |

**Table S4.** Collected data for workplaces.

| Workplace   |                |                     |                      |
|-------------|----------------|---------------------|----------------------|
| Age bracket | Demography (%) | Desired speed (m/s) | Desired distance (m) |
| [0,5[       | 0              | $N(0.88;0.106)$     | $N(1.26;0.125)$      |
| [5,10[      | 0              | $N(1.16;0.043)$     |                      |
| [10,15[     | 0              | $N(1.21;0.046)$     | $N(1.31;0.135)$      |
| [15,20[     | 7.75           | $N(1.39;0.035)$     |                      |
| [20,25[     | 7.65           | $N(1.35;0.023)$     | $N(1.35;0.141)$      |
| [25,30[     | 15.34          |                     |                      |
| [30,35[     | 14.41          | $N(1.43;0.030)$     | $N(1.38;0.108)$      |
| [35,40[     | 12.20          |                     |                      |
| [40,45[     | 10.35          | $N(1.434;0.021)$    | $N(1.36;0.128)$      |
| [45,50[     | 9.02           |                     |                      |
| [50,55[     | 8.38           | $N(1.433;0.015)$    | $N(1.30;0.131)$      |
| [55,60[     | 07.90          |                     |                      |
| [60,65[     | 7.00           | $N(1.339;0.018)$    | $N(1.37;0.129)$      |
| [65,70[     | 0              |                     |                      |
| [70,75[     | 0              | $N(1.262;0.015)$    | $N(1.49;0.130)$      |
| [75,80[     | 0              |                     |                      |

**Table S5.** Collected data for public spaces/other locations.

| Public space/other locations |                |                     |                      |
|------------------------------|----------------|---------------------|----------------------|
| Age bracket                  | Demography (%) | Desired speed (m/s) | Desired distance (m) |
| [0,5[                        | 0              | $N(0.88;0.1061)$    | $N(1.99;0.056)$      |
| [5,10[                       | 0.6            | $N(1.11;0.028)$     |                      |
| [10,15[                      | 1              | $N(1.35;0.012)$     | $N(2.04;0.075)$      |
| [15,20[                      | 12.75          | $N(1.39;0.035)$     |                      |
| [20,25[                      | 12.25          | $N(1.34;0.038)$     | $N(2.16;0.072)$      |
| [25,30[                      | 12.50          |                     |                      |
| [30,35[                      | 12.04          | $N(1.26;0.032)$     | $N(2.19;0.0814)$     |
| [35,40[                      | 11.42          |                     |                      |
| [40,45[                      | 10.03          | $N(1.26;0.0478)$    | $N(2.15;0.076)$      |
| [45,50[                      | 6.05           |                     |                      |
| [50,55[                      | 5.43           | $N(1.23;0.041)$     | $N(2.11;0.066)$      |
| [55,60[                      | 5.11           |                     |                      |
| [60,65[                      | 4.49           | $N(1.21;0.049)$     | $N(2.12;0.073)$      |
| [65,70[                      | 3.44           |                     |                      |
| [70,75[                      | 2.08           | $N(0.95;0.23)$      | $N(2.24;0.047)$      |
| [75,80[                      | 1.35           |                     |                      |

**Table S6.** Weight and relaxation time of the Moroccan population.

| Age bracket | Weight (kg)        | $\tau_i$ (s) |
|-------------|--------------------|--------------|
| [0,5[       | $N(13.10; 4.05)$   | 0.5          |
| [5,10[      | $N(20.91; 2.935)$  |              |
| [10,15[     | $N(34.525; 6.553)$ |              |
| [15,20[     | $N(50.532; 7.196)$ | 0.54         |
| [20,25[     | $N(60.95; 10.45)$  |              |
| [25,30[     | $N(66.05; 13.25)$  |              |
| [30,35[     | $N(73.25; 14.75)$  |              |
| [35,40[     |                    |              |
| [40,45[     | $N(73.55; 16.25)$  | 0.71         |
| [45,50[     |                    |              |
| [50,55[     | $N(73.10; 23.00)$  |              |
| [55,60[     |                    |              |
| [60,65[     | $N(72.1; 13.63)$   |              |
| [65,70[     | $N(71.99; 13.63)$  |              |
| [70,75[     | $N(67.05; 15.50)$  |              |
| [75,80[     | $N(70.39; 16.71)$  |              |
